# Supplementary material for: Joint damage is amplified in rheumatoid arthritis patients with positive thyroid autoantibodies
Source: PeerJ. 2018 Jan 4;6:e4216. doi: 10.7717/peerj.4216 (PMC5756613; doi:10.7717/peerj.4216)
Supplement: Supplemental Information 1 — A total of 125 RA patients were included in the statistical analysis. [file peerj-06-4216-s001.xlsx]

## Sheet: Sheet 1
Patient number	Gender	Age	Disease duration	Disease duration group	Onset age	Entry Date	Smoking	Previous medications-Naive	GCs	MTX	LEF	SASP	HCQ	CysA	Biologics	28TJC	28SJC	HAQ	HAQ>1	PTGA	PRGA	PAINVAS	CRP	Integer of CRP	ESR	RF	RF+	RF titer≥3 ULN	ACPA	ACPA+	ACPA titer≥3 ULN	DAS28-CRP	DAS28-ESR	SDAI	CDAI	RAPID3	DAS28-CRP-HDA	DAS28-ESR-HDA	SDAI-HDA	CDAI-HDA	RAPID3-HDA	FT3	FT3 reduced	FT3 elevated	Abnormal FT3	FT4	FT4 reduced	FT4 elevated	Abnormal FT4
1	2	51	36	3	48	2015-02-05	0	0	1	0	0	0	0	0	0	16	10	0.25	0	6	6	6	81	81	60	528	1	1	300	1	1	6.51186	6.83148	46.1	38	4.2775	1	1	1	1	1	5.69	0	0	0	16.34	0	0	0
2	2	52	50	3	47.8333	2015-02-06	0	1	0	0	0	0	0	0	0	2	2	0.125	0	4	4	2	30.1	30	65	11	0	0	24.4	1	0	3.94417	4.67001	15.01	12	2.13875	0	0	0	0	0	5.09	0	0	0	17.84	0	0	0
3	2	70	120	3	60	2015-02-07	0	1	0	0	0	0	0	0	0	10	8	0.25	0	5	5	5	93.2	93	90	92	1	1	44.9	1	0	5.85842	6.4127	37.32	28	3.88833	1	1	1	1	0	4.99	0	0	0	21.27	0	0	0
4	1	44	12	2	43	2015-02-16	0	1	0	0	0	0	0	0	0	21	10	0.125	0	6	6	6	3.28	3	26	11	0	0	5.2	0	0	5.75075	6.57235	43.328	43	4.13875	1	1	1	1	1	6.33	0	0	0	16.65	0	0	0
5	2	47	6	2	46.5	2015-02-16	0	1	0	0	0	0	0	0	0	10	10	0.25	0	6	6	6	54.1	54	84	556	1	1	300	1	1	5.89895	6.59788	37.41	32	4.2775	1	1	1	1	1	3.73	0	0	0	14.93	0	0	0
6	2	46	108	3	37	2015-03-06	0	0	1	1	1	0	0	0	0	8	3	0.875	0	7	7	7	90.2	90	91	367	1	1	300	1	1	5.6328	6.2065	34.02	25	5.63792	1	1	1	1	1	3.55	0	0	0	15.15	0	0	0
7	1	51	6	2	50.5	2015-03-24	1	0	1	0	0	0	0	0	0	6	4	0.375	0	4	4	4	5.44	5	24	2650	1	1	300	1	1	4.09675	4.71635	18.544	18	3.08292	0	0	0	0	0	4.74	0	0	0	17.35	0	0	0
8	2	50	4	1	49.6667	2015-03-26	0	1	0	0	0	0	0	0	0	12	4	1.125	1	6	6	6	45.4	45	90	390	1	1	21.7	1	0	5.67821	6.48976	32.54	28	5.24875	1	1	1	1	1	3.14	1	0	1	12.58	0	0	0
9	1	55	120	3	45	2015-04-10	0	0	1	1	0	1	0	0	0	1	2	0.125	0	4	4	3	17.5	18	34	11	0	0	1.2	0	0	3.53598	3.98443	12.75	11	2.47208	0	0	0	0	0	4.45	0	0	0	12.17	0	0	0
10	2	28	156	3	15	2015-04-15	0	0	1	1	0	0	1	0	0	4	3	0.25	0	9	9	3	1.3	1	21	207	1	1	4.4	0	0	4.07451	4.99614	25.13	25	4.2775	0	0	0	1	1	5.51	0	0	0	19.93	0	0	0
11	2	71	156	3	58	2015-04-16	0	0	1	0	0	0	0	0	0	15	0	1.25	1	7	7	5	129	129	117	2480	1	1	300	1	1	5.86118	6.48239	41.9	29	5.3875	1	1	1	1	1	3.59	0	0	0	14.75	0	0	0
12	2	51	84	3	44	2015-04-21	0	0	0	0	0	0	0	0	0	18	10	0.625	0	8	8	7	79	79	60	296	1	1	300	1	1	6.91885	7.24736	51.9	44	5.69375	1	1	1	1	1	4.13	0	0	0	13.79	0	0	0
13	2	56	36	3	53	2015-04-28	0	1	0	0	0	0	0	0	0	8	8	1	0	5	5	6	33.2	33	36	11	0	0	2	0	0	5.30537	5.58434	29.32	26	4.77667	1	1	1	1	1	3.69	0	0	0	19.86	0	0	0
14	2	38	3	1	37.75	2015-05-04	0	0	0	1	0	0	0	0	0	7	6	1	0	5	5	3	14.7	15	50	11	0	0	3	0	0	4.82561	5.60589	24.47	23	3.77667	0	1	0	1	0	4.64	0	0	0	20.42	0	0	0
15	2	51	84	3	44	2015-05-15	0	0	0	1	1	0	0	0	0	0	0	0	0	0	0	0	9.19	9	54	166	1	1	17.3	0	0	1.78893	2.79229	0.919	0	0	0	0	0	0	0	28.31	0	1	1	87.41	0	1	1
16	2	47	60	3	42	2015-05-19	0	0	1	0	1	1	0	0	0	11	13	0.875	0	8	7	6	45	45	37	35	1	0	8.8	0	0	6.32518	6.51451	43.5	39	5.63792	1	1	1	1	1	5.83	0	0	0	14.35	0	0	0
17	2	58	120	3	48	2015-05-19	0	1	0	0	0	0	0	0	0	2	7	0.625	0	5	5	4	24.9	25	95	152	1	1	300	1	1	4.36568	5.42048	21.49	19	3.69375	0	1	0	0	0	3.88	0	0	0	15.86	0	0	0
18	2	41	12	2	40	2015-05-27	0	1	0	0	0	0	0	0	0	7	6	0.75	0	7	6	5	14.7	15	91	50	1	0	76.6	1	1	5.10561	6.30508	27.47	26	4.8325	1	1	1	1	1	3.62	0	0	0	11.37	1	0	1
19	2	75	2	1	74.8333	2015-05-27	0	1	0	0	0	0	0	0	0	16	8	0.125	0	3	4	4	18.2	18	76	10	0	0	11.3	0	0	5.47196	6.48347	32.82	31	2.88833	0	1	1	1	0	2.78	1	0	1	5.73	1	0	1
20	2	57	48	3	53	2015-06-01	0	1	0	0	0	0	0	0	0	13	13	0.375	0	6	6	4	11.2	11	41	290	1	1	300	1	1	5.72323	6.46816	39.12	38	3.74958	1	1	1	1	0	3.89	0	0	0	11.54	0	0	0
21	2	67	60	3	62	2015-06-03	0	0	1	0	0	0	0	0	0	3	9	1.125	1	7	6	6	89.1	89	127	64	1	1	90.7	1	1	5.36988	6.18088	33.91	25	5.58208	1	1	1	1	1	5.05	0	0	0	28.89	0	1	1
22	1	49	24	3	47	2015-06-11	1	0	1	1	1	0	0	0	0	6	2	0.625	0	5	5	4	31.7	32	71	147	1	1	7.4	0	0	4.68644	5.45157	21.17	18	3.69375	0	1	0	0	0	5.76	0	0	0	16.73	0	0	0
23	2	50	96	3	42	2015-06-12	0	0	0	1	1	0	0	0	0	4	0	0.375	0	3	3	4	3.28	3	16	9	0	0	71.6	1	1	2.99907	3.48081	10.328	10	2.74958	0	0	0	0	0	4.23	0	0	0	14.35	0	0	0
24	2	48	24	3	46	2015-06-12	0	1	0	0	0	0	0	0	0	3	2	0.875	0	4	4	3	17.9	18	47	296	1	1	84.9	1	1	3.94593	4.62103	14.79	13	3.30458	0	0	0	0	0	4.97	0	0	0	11.58	0	0	0
25	2	39	120	3	29	2015-06-20	0	0	1	1	0	0	1	0	0	0	2	0.625	0	3	3	3	109	109	122	9	0	0	19	1	0	3.46815	4.17879	18.9	8	2.69375	0	0	0	0	0	3.59	0	0	0	11.45	1	0	1
26	1	44	84	3	37	2015-07-04	1	0	0	1	0	0	0	0	0	9	5	0.125	0	2	2	2	38.3	38	74	118	1	1	300	1	1	4.86498	5.59894	21.83	18	1.47208	0	1	0	0	0	3.66	0	0	0	17.16	0	0	0
27	2	34	24	3	32	2015-07-13	0	0	1	0	0	0	0	0	0	7	4	1	0	4	4	3	44.8	45	112	512	1	1	10.9	0	0	4.93993	5.90457	23.48	19	3.44333	0	1	0	0	0	3.93	0	0	0	14.35	0	0	0
28	2	31	72	3	25	2015-07-18	0	1	0	0	0	0	0	0	0	19	16	1.5	1	6	6	4	19.3	19	15	124	1	1	9.7	0	0	6.43945	6.29662	48.93	47	4.99833	1	1	1	1	1	5.11	0	0	0	15.42	0	0	0
29	2	60	72	3	54	2015-07-20	0	0	1	1	0	0	0	1	0	5	4	2	1	8	8	9	58.4	58	65	2610	1	1	300	1	1	5.36011	5.85427	30.84	25	7.88667	1	1	1	1	1	5.73	0	0	0	20.5	0	0	0
30	1	52	84	3	45	2015-07-22	0	1	0	0	0	0	0	0	0	8	6	0	0	3	3	2	3.28	3	9	9	0	0	2.9	0	0	4.14884	4.22783	20.328	20	1.66667	0	0	0	0	0	6.27	0	0	0	18.36	0	0	0
31	2	25	12	2	24	2015-07-23	0	0	1	0	1	0	0	0	1	0	0	0	0	0	0	0	25.6	26	62	9	0	0	1.9	0	0	2.1465	2.88899	2.56	0	0	0	0	0	0	0	4.76	0	0	0	15.14	0	0	0
32	2	56	84	3	49	2015-07-23	0	0	1	1	0	0	0	0	0	13	2	1.25	1	4	4	4	37	37	117	267	1	1	63.1	1	1	5.24462	6.30861	26.7	23	4.05417	1	1	1	1	1	4.77	0	0	0	19.59	0	0	0
33	2	35	7	2	34.4167	2015-07-24	0	0	1	1	0	0	1	0	0	12	10	0.75	0	3	3	3	39	39	32	9	0	0	29.1	1	0	5.53333	5.67135	31.9	28	2.8325	1	1	1	1	0	3.7	0	0	0	15.96	0	0	0
34	2	60	36	3	57	2015-07-28	0	1	0	0	0	0	0	0	0	12	11	0.625	0	4	4	6	35.2	35	91	240	1	1	34.4	1	0	5.67862	6.58615	34.52	31	4.02708	1	1	1	1	1	4.31	0	0	0	16.42	0	0	0
35	2	46	120	3	36	2015-07-31	0	1	0	0	0	0	0	0	0	6	3	0.125	0	6	6	4	3.28	3	22	50	1	0	15.8	0	0	4.15575	4.86042	21.328	21	3.47208	0	0	0	0	0	5.82	0	0	0	19.04	0	0	0
36	2	40	6	2	39.5	2015-08-07	0	1	0	0	0	0	0	0	0	14	13	1.25	1	5	5	5	9.82	10	54	327	1	1	300	1	1	5.62812	6.59717	37.982	37	4.72083	1	1	1	1	1	5.51	0	0	0	14.65	0	0	0
37	2	61	300	3	36	2015-08-08	0	1	0	0	0	0	0	0	0	20	15	2.625	1	6	8	6	34.2	34	90	558	1	1	300	1	1	6.66876	7.5787	52.42	49	6.91375	1	1	1	1	1	2.85	1	0	1	19.22	0	0	0
38	2	28	12	2	27	2015-08-10	0	0	0	1	1	0	0	0	0	10	10	0.875	0	8	6	6	68.2	68	81	163	1	1	300	1	1	6.26059	6.85243	40.82	34	5.63792	1	1	1	1	1	4.02	0	0	0	17.49	0	0	0
39	1	54	96	3	46	2015-08-14	1	1	0	0	0	0	0	0	0	3	3	0.5	0	7	7	6	52.7	53	91	588	1	1	53.7	1	0	4.83096	5.59252	25.27	20	5.44333	0	1	0	0	1	4.06	0	0	0	16.57	0	0	0
40	1	65	192	3	49	2015-08-28	1	0	1	1	1	0	0	0	1	0	0	0	0	0	1	2	26.1	26	69	108	1	1	274.2	1	1	2.1465	2.96387	3.61	1	0.666667	0	0	0	0	0	4.7	0	0	0	20.11	0	0	0
41	2	56	11	2	55.0833	2015-09-02	0	0	1	1	0	0	0	0	0	1	1	0	0	4	2	2	3.44	3	11	244	1	1	300	1	1	2.85907	3.07853	8.344	8	2	0	0	0	0	0	5.71	0	0	0	15.9	0	0	0
42	2	48	72	3	42	2015-09-12	0	1	0	0	0	0	0	0	0	9	8	0.25	0	5	5	5	3.28	3	12	34	1	0	3.7	0	0	4.63103	4.91139	27.328	27	3.61083	0	0	1	1	0	5.11	0	0	0	15.88	0	0	0
43	2	61	84	3	54	2015-09-12	0	0	1	0	1	0	1	0	0	3	1	0.75	0	3	4	2	3.28	3	48	9	0	0	300	1	1	3.12901	4.37979	11.328	11	2.49917	0	0	0	0	0	5.77	0	0	0	15.79	0	0	0
44	2	37	204	3	20	2015-09-16	0	1	0	0	0	0	0	0	0	11	11	0.75	0	7	6	4	16.7	17	25	1450	1	1	300	1	1	5.7665	6.01918	36.67	35	4.49917	1	1	1	1	1	4.21	0	0	0	15.14	0	0	0
45	2	71	360	3	41	2015-09-18	0	0	0	1	0	0	0	0	1	16	15	1.625	1	8	8	7	3.28	3	32	9	0	0	0	0	0	5.9035	6.87045	47.328	47	6.80375	1	1	1	1	1	3.68	0	0	0	15.01	0	0	0
46	1	53	8	2	52.3333	2015-09-27	1	0	1	0	1	0	0	0	0	3	1	0	0	0	1	2	53.8	54	65	406	1	1	300	1	1	3.65259	4.17202	10.38	5	0.666667	0	0	0	0	0	3.95	0	0	0	15.75	0	0	0
47	2	36	72	3	30	2015-09-28	0	1	0	0	0	0	0	0	0	13	12	1.25	1	8	8	9	36.3	36	80	754	1	1	32.3	1	0	6.36899	7.17648	44.63	41	7.05417	1	1	1	1	1	6.1	0	0	0	18.19	0	0	0
48	2	60	300	3	35	2015-10-13	0	0	1	1	0	0	0	0	0	13	10	0.875	0	5	5	4	13.6	14	108	606	1	1	300	1	1	5.53944	6.88204	34.36	33	3.97125	1	1	1	1	0	4.01	0	0	0	18.23	0	0	0
49	2	68	3	1	67.75	2015-10-14	0	1	0	0	0	0	0	0	0	12	7	1.125	1	7	6	7	65.9	66	136	2420	1	1	168.7	1	1	6.1344	7.09957	38.59	32	5.91542	1	1	1	1	1	3.57	0	0	0	18.68	0	0	0
50	2	45	180	3	30	2015-10-15	0	0	1	1	1	0	0	0	0	5	5	0.125	0	2	2	2	9.14	9	35	9	0	0	2.2	0	0	3.94723	4.64704	14.914	14	1.47208	0	0	0	0	0	4.64	0	0	0	17.45	0	0	0
51	2	58	336	3	30	2015-10-16	0	0	0	1	0	0	0	0	0	1	1	0.75	0	4	4	2	3.28	3	23	37	1	0	203.5	1	1	2.85907	3.59485	10.328	10	2.8325	0	0	0	0	0	4.51	0	0	0	15.92	0	0	0
52	2	48	2	1	47.8333	2015-10-19	1	1	0	0	0	0	0	0	0	1	1	0.875	0	6	6	6	3.28	3	13	319	1	1	31.1	1	0	3.13907	3.47546	14.328	14	4.97125	0	0	0	0	1	4.81	0	0	0	19.84	0	0	0
53	2	53	144	3	41	2015-10-19	0	0	1	0	0	0	0	0	0	20	20	1.375	1	8	8	6	6.24	6	64	372	1	1	300	1	1	6.53712	7.78781	56.624	56	6.19292	1	1	1	1	1	4.56	0	0	0	19.56	0	0	0
54	2	61	264	3	39	2015-10-20	0	1	0	0	0	0	0	0	0	9	8	1.875	1	8	8	4	4.06	4	45	18	0	0	300	1	1	5.13136	6.25662	33.406	33	6.08125	1	1	1	1	1	3.89	0	0	0	18.46	0	0	0
55	2	34	3	1	33.75	2015-10-21	0	1	0	0	0	0	0	0	0	10	10	1.125	1	7	7	4	39.2	39	67	9	0	0	4.2	0	0	5.92431	6.5796	37.92	34	4.91542	1	1	1	1	1	4.27	0	0	0	17.42	0	0	0
56	1	18	72	3	12	2015-10-21	1	1	0	0	0	0	0	0	0	18	18	0.875	0	8	5	4	61.5	62	52	26	1	0	3.7	0	0	7.13535	7.44969	55.15	49	4.97125	1	1	1	1	1	4.53	0	0	0	16.09	0	0	0
57	2	52	96	3	44	2015-10-24	0	1	0	0	0	0	0	0	0	14	13	1	0	5	5	4	7.76	8	45	9	0	0	135	1	1	5.55588	6.46955	37.776	37	4.11	1	1	1	1	1	4.12	0	0	0	27.42	0	1	1
58	1	51	24	3	49	2015-10-26	1	0	1	0	0	0	0	0	0	0	0	0.25	0	8	6	6	42.9	43	48	9	0	0	50.7	1	0	3.44231	3.82984	18.29	14	4.94417	0	0	0	0	1	4.72	0	0	0	18.41	0	0	0
59	2	69	24	3	67	2015-11-07	0	1	0	0	0	0	0	0	0	5	4	0	0	2	2	2	3.28	3	58	9	0	0	236.8	1	1	3.55126	4.93451	13.328	13	1.33333	0	0	0	0	0	3.38	1	0	1	16.43	0	0	0
60	2	39	12	2	38	2015-11-13	0	1	0	0	0	0	0	0	0	5	5	1.125	1	6	6	4	3.3	3	47	16	0	0	300	1	1	4.17736	5.4134	22.33	22	4.58208	0	1	0	0	1	4.88	0	0	0	14.07	0	0	0
61	2	60	240	3	40	2015-11-16	0	0	1	0	0	0	0	0	0	0	0	0	0	2	2	0	88.6	89	70	9	0	0	3.7	0	0	2.85993	3.25395	12.86	4	0.666667	0	0	0	0	0	5.52	0	0	0	17.35	0	0	0
62	2	32	60	3	27	2015-11-23	0	0	1	1	1	1	0	0	1	16	9	0.625	0	3	3	4	3.3	3	7	11	0	0	17.1	0	0	4.95907	4.86214	31.33	31	3.02708	0	0	1	1	0	5.48	0	0	0	18.65	0	0	0
63	1	62	12	2	61	2015-12-02	1	0	1	0	0	0	0	0	0	4	0	0.375	0	4	4	4	33.4	33	109	52	1	0	0	0	0	3.90949	4.96394	15.34	12	3.08292	0	0	0	0	0	4.53	0	0	0	13.77	0	0	0
64	2	71	24	3	69	2015-12-15	0	1	0	0	0	0	0	0	0	1	0	0.25	0	3	2	2	98.1	98	125	772	1	1	300	1	1	3.59424	4.35982	15.81	6	1.94417	0	0	0	0	0	3.67	0	0	0	15.03	0	0	0
65	2	62	120	3	52	2015-12-17	0	1	0	0	0	0	0	0	0	7	3	0.125	0	2	2	2	20.5	21	88	620	1	1	300	1	1	4.31937	5.38073	16.05	14	1.47208	0	1	0	0	0	4.36	0	0	0	16.18	0	0	0
66	2	64	240	3	44	2015-12-20	0	0	1	1	1	0	0	0	0	1	1	0.125	0	2	2	2	1.74	2	16	49	1	0	2.7	0	0	2.4755	3.06081	6.174	6	1.47208	0	0	0	0	0	4.17	0	0	0	12.59	0	0	0
67	1	44	24	3	42	2016-01-02	0	0	1	0	0	0	0	0	0	7	7	1.25	1	6	6	4	30.7	31	136	3990	1	1	270.8	1	1	5.2701	6.50129	29.07	26	4.72083	1	1	1	1	1	3.56	0	0	0	11.51	0	0	0
68	2	48	240	3	28	2016-01-06	0	0	1	0	1	0	0	0	0	11	5	0.75	0	5	5	4	62.7	63	98	286	1	1	300	1	1	5.64061	6.39289	32.27	26	3.8325	1	1	1	1	0	3.99	0	0	0	17.28	0	0	0
69	1	46	72	3	40	2016-01-09	1	1	0	0	0	0	0	0	0	6	4	0.5	0	6	6	6	23.7	24	26	95	1	1	17.6	0	0	4.89051	5.05238	24.37	22	4.555	0	0	0	0	1	4.6	0	0	0	14.36	0	0	0
70	2	66	240	3	46	2016-01-27	0	1	0	0	0	0	0	0	0	11	8	0.75	0	7	8	6	3.3	3	34	109	1	1	18.2	1	0	5.08834	6.09772	34.33	34	5.16583	0	1	1	1	1	4.76	0	0	0	11.99	0	0	0
71	1	61	4	1	60.6667	2016-02-15	1	0	0	0	0	0	0	0	0	13	11	2.875	1	4	4	6	134	134	79	160	1	1	300	1	1	6.93366	7.26638	54.4	41	8.85792	1	1	1	1	1	4.42	0	0	0	20.72	0	0	0
72	2	51	240	3	31	2016-02-26	0	1	0	0	0	0	0	0	0	11	11	2.125	1	5	6	8	30.6	31	72	119	1	1	58.4	1	1	5.69363	6.47963	36.06	33	6.69208	1	1	1	1	1	4.39	0	0	0	14.17	0	0	0
73	2	52	6	2	51.5	2016-03-01	0	0	1	0	0	0	0	0	0	2	2	0.5	0	3	3	4	18.4	18	12	839	1	1	300	1	1	3.62794	3.34737	11.84	10	2.61083	0	0	0	0	0	4.7	0	0	0	15.19	0	0	0
74	2	61	240	3	41	2016-03-03	0	0	1	1	1	0	0	0	0	2	2	0.375	0	2	2	2	3.3	3	16	11	0	0	6.1	0	0	2.92701	3.40875	8.33	8	1.74958	0	0	0	0	0	3.74	0	0	0	13.77	0	0	0
75	2	66	24	3	64	2016-03-03	0	0	1	0	1	0	0	0	0	19	17	1.625	1	8	8	6	25.2	25	107	665	1	1	300	1	1	6.84837	7.98643	54.52	52	6.47042	1	1	1	1	1	3.81	0	0	0	16.12	0	0	0
76	2	54	36	3	51	2016-03-10	0	1	0	0	0	0	0	0	0	2	0	0.25	0	2	2	0	9.86	10	84	471	1	1	300	1	1	2.8952	4.17353	6.986	6	0.944167	0	0	0	0	0	3.36	1	0	1	15.84	0	0	0
77	1	48	72	3	42	2016-03-14	1	1	0	0	0	0	0	0	0	4	1	0.125	0	0	0	2	49.5	50	50	107	1	1	121.7	1	1	3.77546	4.13842	9.95	5	0.805417	0	0	0	0	0	4.32	0	0	0	15.29	0	0	0
78	2	76	48	3	72	2016-03-20	1	0	1	0	0	0	0	0	0	2	3	1.25	1	8	8	4	32	32	87	132	1	1	5.6	0	0	4.61568	5.52307	24.2	21	5.3875	0	1	0	0	1	3.97	0	0	0	13.75	0	0	0
79	1	52	96	3	44	2016-03-21	1	0	1	0	0	0	0	0	0	2	2	1.125	1	9	2	7	80.6	81	32	1070	1	1	300	1	1	4.99436	4.87395	23.06	15	6.58208	0	0	0	0	1	3.33	1	0	1	17.57	0	0	0
80	2	48	9	2	47.25	2016-03-22	0	0	1	1	0	0	0	0	0	7	8	0.625	0	3	4	4	27.4	27	67	526	1	1	300	1	1	4.85317	5.63687	24.74	22	3.02708	0	1	0	0	0	4.14	0	0	0	16.2	0	0	0
81	1	44	2	1	43.8333	2016-03-23	0	1	0	0	0	0	0	0	0	3	1	0.125	0	1	1	4	30	30	62	11	0	0	0.1	0	0	3.58618	4.27894	9	6	1.80542	0	0	0	0	0	5.17	0	0	0	15.88	0	0	0
82	2	61	72	3	55	2016-03-25	0	1	0	0	0	0	0	0	0	9	9	1.5	1	4	4	6	43.9	44	127	11	0	0	12.3	0	0	5.4104	6.47093	30.39	26	4.99833	1	1	1	1	1	3.03	1	0	1	15.5	0	0	0
83	2	74	12	2	73	2016-03-30	0	1	0	0	0	0	0	0	0	15	12	1	0	8	8	7	41.7	42	104	187	1	1	300	1	1	6.57285	7.50989	47.17	43	6.11	1	1	1	1	1	3.58	0	0	0	18.7	0	0	0
84	2	49	60	3	44	2016-04-15	0	0	0	1	0	1	1	0	0	3	1	0.875	0	6	5	6	9.02	9	26	90	1	1	300	1	1	3.87888	4.37062	15.902	15	4.97125	0	0	0	0	1	5.1	0	0	0	17.98	0	0	0
85	2	68	12	2	67	2016-04-18	0	1	0	0	0	0	0	0	0	3	1	0.25	0	3	3	2	7.73	8	33	1330	1	1	52.1	1	0	3.42095	4.1175	10.773	10	1.94417	0	0	0	0	0	5.19	0	0	0	15.93	0	0	0
86	2	47	72	3	41	2016-04-18	0	0	1	1	0	0	0	0	0	4	0	0.125	0	2	2	2	59	59	77	11	0	0	18	1	0	3.83396	4.44066	13.9	8	1.47208	0	0	0	0	0	3.71	0	0	0	12.47	0	0	0
87	2	68	192	3	52	2016-04-19	0	1	0	0	0	0	0	0	0	13	12	1.25	1	8	8	8	111	111	105	239	1	1	300	1	1	6.76772	7.36683	52.1	41	6.72083	1	1	1	1	1	3.57	0	0	0	15.62	0	0	0
88	2	37	180	3	22	2016-04-20	0	1	0	0	0	0	0	0	0	16	13	1.875	1	4	6	6	9.88	10	39	11	0	0	26.6	1	0	5.6328	6.37405	39.988	39	5.41458	1	1	1	1	1	4.25	0	0	0	14.92	0	0	0
89	2	70	3	1	69.75	2016-04-22	0	1	0	0	0	0	0	0	0	22	15	0.625	0	4	6	6	4.75	5	35	11	0	0	1.4	0	0	5.8761	6.75981	47.475	47	4.02708	1	1	1	1	1	4.94	0	0	0	21.25	0	0	0
90	1	46	24	3	44	2016-04-22	1	0	1	1	0	0	0		0	0	0	0	0	0	0	0	4.54	5	39	309	1	1	300	1	1	1.60503	2.56449	0.454	0	0	0	0	0	0	0	4.22	0	0	0	15.57	0	0	0
91	1	61	48	3	57	2016-04-26	0	0	1	0	0	0	0	0	0	0	1	0.25	0	4	1	0	3.3	3	29	346	1	1	300	1	1	2.29907	3.19711	6.33	6	1.61083	0	0	0	0	0	5.33	0	0	0	16.34	0	0	0
92	1	80	120	3	70	2016-04-27	0	0	1	1	0	0	0	0	0	0	0	1.5	1	9	7	4	36.7	37	80	328	1	1	300	1	1	3.52953	4.32742	19.67	16	5.99833	0	0	0	0	1	3.56	0	0	0	14.14	0	0	0
93	2	57	120	3	47	2016-04-29	0	1	0	0	0	0	0	0	0	16	14	1.875	1	7	7	6	78.5	79	85	403	1	1	14.4	0	0	6.80519	7.37752	51.85	44	6.41458	1	1	1	1	1	4.51	0	0	0	22.39	0	0	0
94	1	49	12	2	48	2016-05-02	1	0	0	1	1	0	0	0	0	4	4	0.125	0	6	5	4	44.8	45	46	458	1	1	300	1	1	4.85831	5.20005	23.48	19	3.47208	0	1	0	0	0	4.35	0	0	0	18.89	0	0	0
95	1	48	24	3	46	2016-05-03	0	1	0	0	0	0	0	0	0	3	3	0	0	0	0	1	3.51	4	49	1000	1	1	205.1	1	1	2.99432	4.1792	6.351	6	0.333333	0	0	0	0	0	5.65	0	0	0	18.18	0	0	0
96	1	66	10	2	65.1667	2016-05-03	0	1	0	0	0	0	0	0	0	22	17	2.625	1	8	8	8	75.9	76	133	892	1	1	300	1	1	7.42487	8.32435	62.59	55	8.24708	1	1	1	1	1	3.51	0	0	0	13.74	0	0	0
97	2	46	5	1	45.5833	2016-05-06	0	0	1	0	1	1	1	0	1	6	6	0.875	0	5	5	4	43.6	44	50	599	1	1	300	1	1	5.08797	5.49599	26.36	22	3.97125	0	1	1	0	0	3.44	1	0	1	13.17	0	0	0
98	2	49	240	3	29	2016-05-20	0	1	0	0	0	0	0	0	0	1	1	0.625	0	2	2	2	12.2	12	51	373	1	1	14	0	0	3.00338	3.87228	7.22	6	2.02708	0	0	0	0	0	4.25	0	0	0	18.86	0	0	0
99	1	50	2	1	49.8333	2016-05-23	0	1	0	0	0	0	0	0	0	4	3	1.375	1	5	6	6	66.8	67	63	616	1	1	300	1	1	4.784	5.20517	24.68	18	5.19292	0	1	0	0	1	4.09	0	0	0	14.92	0	0	0
100	1	66	12	2	65	2016-05-23	1	1	0	0	0	0	0	0	0	16	16	2.625	1	7	7	7	46.1	46	123	2640	1	1	300	1	1	6.68605	7.70853	50.61	46	7.58042	1	1	1	1	1	3.99	0	0	0	17.17	0	0	0
101	2	60	240	3	40	2016-05-24	0	1	0	0	0	0	0	0	0	6	2	1.625	1	8	6	6	28.5	29	108	319	1	1	109.7	1	1	5.07213	6.16519	24.85	22	6.47042	0	1	0	0	1	3.57	0	0	0	17.06	0	0	0
102	2	53	72	3	47	2016-05-25	0	0	1	0	1	1	1	0	0	15	12	1	0	3	3	3	3.3	3	45	2290	1	1	16.1	0	0	5.01789	6.22348	33.33	33	3.11	0	1	1	1	0	4.58	0	0	0	12.52	0	0	0
103	2	52	48	3	48	2016-05-25	0	0	1	1	1	0	0	0	0	3	3	0	0	2	2	3	25.8	26	108	33	1	0	300	1	1	3.88142	5.01241	12.58	10	1.66667	0	0	0	0	0	3.71	0	0	0	15.2	0	0	0
104	2	20	3	1	19.75	2016-05-26	0	1	0	0	0	0	0	0	0	0	0	0	0	0	0	0	66.7	67	45	11	0	0	11.2	0	0	2.47902	2.66466	6.67	0	0	0	0	0	0	0	4.36	0	0	0	15.17	0	0	0
105	2	62	84	3	55	2016-05-26	0	0	0	1	1	0	0	0	0	1	2	0.125	0	0	0	0	36.4	36	65	35	1	0	300	1	1	3.21591	3.87805	6.64	3	0.13875	0	0	0	0	0	4.2	0	0	0	15.74	0	0	0
106	2	54	48	3	50	2016-05-28	0	0	0	1	1	0	0	0	0	0	0	0	0	0	0	0	20.2	20	49	79	1	1	300	1	1	2.05603	2.72427	2.02	0	0	0	0	0	0	0	4.17	0	0	0	16.11	0	0	0
107	2	57	36	3	54	2016-05-30	0	0	1	1	0	0	0	1	0	10	5	0.375	0	2	2	2	3.16	3	15	11	0	0	11.5	0	0	4.13604	4.57261	19.316	19	1.74958	0	0	0	0	0	3.58	0	0	0	16.84	0	0	0
108	2	49	120	3	39	2016-05-31	0	1	0	0	0	0	0	0	0	1	1	0.75	0	5	4	6	77.7	78	88	505	1	1	139.1	1	1	4.073	4.67414	18.77	11	4.49917	0	0	0	0	1	3.55	0	0	0	14.91	0	0	0
109	2	80	120	3	70	2016-06-02	0	1	0	0	0	0	0	0	0	16	14	1.875	1	6	5	5	54.3	54	105	1280	1	1	300	1	1	6.5303	7.38544	46.43	41	5.74792	1	1	1	1	1	3.89	0	0	0	19.43	0	0	0
110	2	49	24	3	47	2016-06-03	0	0	1	1	1	0	0	0	0	0	0	0.625	0	3	3	2	77.5	78	54	753	1	1	300	1	1	2.953	3.21229	13.75	6	2.36042	0	0	0	0	0	4.17	0	0	0	16.15	0	0	0
111	2	54	2	1	53.8333	2016-06-06	0	1	0	0	0	0	0	0	0	11	9	2.375	1	8	8	8	11.9	12	46	48	1	0	20.3	1	0	5.70069	6.49736	37.19	36	7.96958	1	1	1	1	1	4.94	0	0	0	18.6	0	0	0
112	2	50	120	3	40	2016-06-27	0	0	1	0	0	0	0	0	0	10	4	2.25	1	7	7	4	19.5	20	45	201	1	1	300	1	1	5.3669	5.97554	29.95	28	6.16417	1	1	1	1	1	3.29	1	0	1	15.06	0	0	0
113	2	49	24	3	47	2016-06-28	0	1	0	0	0	0	0	0	0	9	8	0	0	1	2	2	20.6	21	59	15	0	0	289.2	1	1	4.68473	5.46624	22.06	20	1	0	1	0	0	0	3.62	0	0	0	12.95	0	0	0
114	2	51	108	3	42	2016-07-01	0	0	1	0	0	0	0	0	0	9	2	1.25	1	4	4	4	1.15	1	21	11	0	0	276.9	1	1	3.84551	4.76715	19.115	19	4.05417	0	0	0	0	1	2.83	1	0	1	11.35	1	0	1
115	2	68	12	2	67	2016-07-04	0	1	0	0	0	0	0	0	0	10	6	1.25	1	8	8	6	48.9	49	81	452	1	1	300	1	1	5.94506	6.65285	36.89	32	6.05417	1	1	1	1	1	3.66	0	0	0	15.07	0	0	0
116	1	67	60	3	62	2016-07-04	1	0	1	0	0	0	0	0	0	0	0	0	0	2	2	0	21.9	22	47	409	1	1	41.5	1	0	2.36878	2.9751	6.19	4	0.666667	0	0	0	0	0	4.23	0	0	0	22.5	0	0	0
117	1	64	240	3	44	2016-07-04	0	0	1	0	0	0	1	0	0	3	3	2.375	1	7	8	4	129	129	99	56	1	0	286.3	1	1	5.14724	5.65151	33.9	21	6.30292	1	1	1	0	1	2.44	1	0	1	16.11	0	0	0
118	1	18	36	3	15	2016-07-07	0	1	0	0	0	0	0	0	0	2	0	0.125	0	3	3	0	36.2	36	43	11	0	0	1.8	0	0	3.47189	3.8448	11.62	8	1.13875	0	0	0	0	0	4.61	0	0	0	17.26	0	0	0
119	2	27	60	3	22	2016-07-07	0	1	0	0	0	0	0	0	0	5	0	0.375	0	2	2	2	17.5	18	82	11	0	0	5	0	0	3.5522	4.6169	10.75	9	1.74958	0	0	0	0	0	6.17	0	0	0	19.64	0	0	0
120	2	38	96	3	30	2016-07-21	0	0	1	1	0	0	1	0	0	0	0	0	0	0	0	1	3.16	3	16	40	1	0	300	1	1	1.45907	1.94081	0.316	0	0.333333	0	0	0	0	0	4.19	0	0	0	11.86	0	0	0
121	2	53	96	3	45	2016-08-01	0	0	0	0	0	1	0	0	0	3	2	0.875	0	6	6	6	26.5	27	71	15	0	0	288.5	1	1	4.36552	5.1898	19.65	17	4.97125	0	1	0	0	1	3.18	1	0	1	12.83	0	0	0
122	2	62	132	3	51	2016-08-04	0	0	1	0	0	0	0	0	0	6	6	1.25	1	6	6	6	4.71	5	48	45	1	0	24.8	1	0	4.5026	5.60741	24.471	24	5.3875	0	1	0	1	1	16.13	0	1	1	41.18	0	1	1
123	2	67	72	3	61	2016-08-08	0	0	1	0	1	0	0	0	0	1	0	0.875	0	4	4	4	52.3	52	70	65	1	1	59.4	1	1	3.50931	4.09395	14.23	9	3.63792	0	0	0	0	0	4.76	0	0	0	14.76	0	0	0
124	2	57	120	3	47	2016-08-10	0	1	0	0	0	0	0	0	0	3	4	0.625	0	4	4	6	63.9	64	108	1550	1	1	259.4	1	1	4.55273	5.36744	21.39	15	4.02708	0	1	0	0	1	3.81	0	0	0	14.49	0	0	0
125	2	38	84	3	31	2016-08-15	0	0	1	1	0	0	1	0	0	2	2	1.25	1	6	5	5	3.28	3	42	82	1	1	31.3	1	0	3.48701	4.64431	15.328	15	5.05417	0	0	0	0	1	4.94	0	0	0	16.24	0	0	0
[truncated: 15 more columns]
